# Supplementary material for: Single Mobile Micro Droplet-Particle Pairs Spatially Captured by Macro Host Droplets on a Superhydrophobic Surface
Source: Hindawi journal article supplement (doi:10.1155/2015/801547), 2015-01-01
Supplement: f1 [file 801547.f1.zip]

Archive with 8 entries (8 files):
- fig1.pdf
- Movie S1.mpg
- Movie S2.mpg
- Movie S3.mpg
- Movie S4.mpg
- Movie S5.mpg
- Movie S6.mpg
- Movie S7.mpg
